# Supplementary material for: Senescence-Associated Oxidative DNA Damage Promotes the Generation of Neoplastic Cells
Source: Oxford University Press journal article supplement (doi:10.1158/0008-5472.can-08-2510), 2009-10-14
Supplement: 00085472can082510-sup-stab_2.pdf [file 00085472can082510-sup-stab_2.pdf]

|              | Number of wells<br>with one cell | Number of wells<br>with emergence | % emergence |
|--------------|----------------------------------|-----------------------------------|-------------|
| Experiment 1 | 42                               | 31                                | 73.8        |
| Experiment 2 | 117                              | 91                                | 77          |

**Table 1: Almost all young NHEKs have an emergence potential**

Young NHEKs were diluted to one cell per well and cultured to senescence and emergence. The numbers of cultures performed and the percentages of cultures having developed emerging clones by the end of the experiment are given.
